# Supplementary material for: Effect of surface charge of polyethyleneimine-modified multiwalled carbon nanotubes on the improvement of polymerase chain reaction
Source: Royal Society of Chemistry journal article supplement (doi:10.1039/c0nr00833h), 2011-01-01
Supplement: c0nr00833h.pdf [file c0nr00833h.pdf]

## **Electronic Supplementary Information for**

### **Effect of surface charge of polyethyleneimine-modified multiwalled carbon nanotubes on the improvement of polymerase chain reaction**

Xueyan Cao,<sup>ab</sup> Jingjing Chen,<sup>b</sup> Shihui Wen,<sup>b</sup> Chen Peng,<sup>c</sup> Mingwu Shen,<sup>b</sup> and Xiangyang Shi<sup>\*abd</sup>

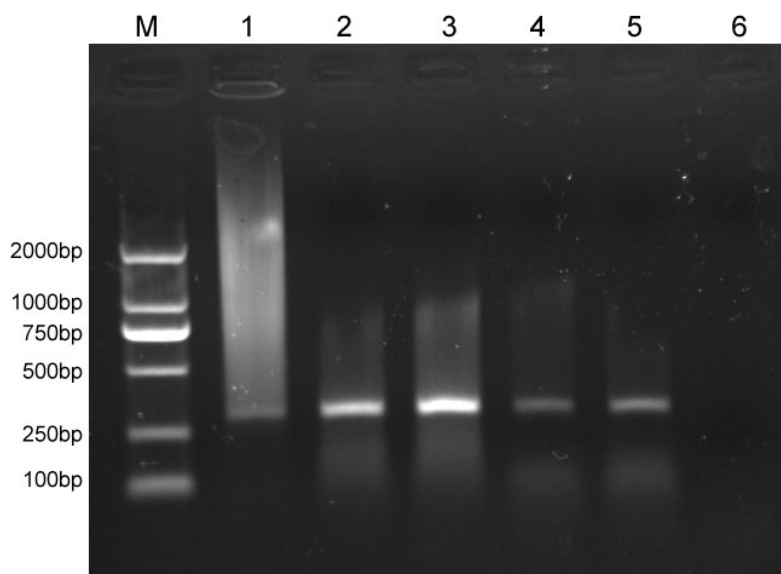

**Figure S1.** Electrophoregrams of PCR products using different MWCNT adding modes. Lane M: DL 2000 marker; Lane 1: two-round PCR; Lane 2: MWCNTs (12.4mg/L) was mixed with PCR mixture; Lane 3: MWCNTs (12.4mg/L) was first mixed with template, followed by adding into mixture of other PCR components; Lane 4: MWCNTs (12.4mg/L) was first mixed with primer, followed by adding into mixture of other PCR components; Lane 5: MWCNTs (12.4mg/L) was first mixed with DNA polymerase, followed by adding into mixture of other PCR components; Lane 6: negative control.

**Table 1.** Efficiency and specificity of PCR using different MWCNT adding modes, such as mixing MWCNTs (12.4mg/L) with mixture of all PCR components, and mixing MWCNTs/template, MWCNTs/primer, and MWCNTs/polymerase pre-mixture into mixture of other PCR components.

| Adding modes       | Efficiency | specificity |
|--------------------|------------|-------------|
| MWCNTs/PCR mixture | 1.033      | 0.83        |
| MWCNTs/template    | 1.116      | 0.81        |
| MWCNTs/primer      | 0.908      | 0.88        |
| MWCNTs/polymerase  | 0.941      | 0.86        |
